# Supplementary material for: Unravelling interplay between molecule-based spin-state switching and electron transport in a single-crystal 3D metal-organic framework
Source: Research Square preprint supplement (doi:10.21203/rs.3.rs-1689712/v1), 2022-06-01

## checkCIF/PLATON report

Structure factors have been supplied for datablock(s) Fe\_trz\_hexa\_420K\_a

THIS REPORT IS FOR GUIDANCE ONLY. IF USED AS PART OF A REVIEW PROCEDURE FOR PUBLICATION, IT SHOULD NOT REPLACE THE EXPERTISE OF AN EXPERIENCED CRYSTALLOGRAPHIC REFEREE.

No syntax errors found.      CIF dictionary      Interpreting this report

### Datablock: Fe\_trz\_hexa\_420K\_a

---

Bond precision:    C-C = 0.0030 A                      Wavelength=1.54178

Cell:                      a=22.1736(14)              b=22.1736(14)              c=7.0796(5)  
                                    alpha=90                      beta=90                      gamma=120

Temperature:              273 K

|                        | Calculated    | Reported         |
|------------------------|---------------|------------------|
| Volume                 | 3014.5(4)     | 3014.5(4)        |
| Space group            | R -3 m        | R -3 m :H        |
| Hall group             | -R 3 2"       | -R 3 2"          |
| Moiety formula         | C12 H9 Fe N12 | ?                |
| Sum formula            | C12 H9 Fe N12 | C108 H72 Fe6 N36 |
| Mr                     | 377.16        | 2209.11          |
| Dx, g cm <sup>-3</sup> | 1.247         | 1.217            |
| Z                      | 6             | 1                |
| Mu (mm <sup>-1</sup> ) | 6.202         | 6.103            |
| F000                   | 1146.0        | 1128.0           |
| F000'                  | 1142.43       |                  |
| h, k, lmax             | 27, 27, 8     | 26, 27, 8        |
| Nref                   | 725           | 725              |
| Tmin, Tmax             |               |                  |
| Tmin'                  |               |                  |

Correction method= Not given

Data completeness= 1.000                      Theta(max)= 72.333

R(reflections)= 0.0266( 698)

wR2(reflections)=  
0.0986( 725)

S = 0.945

Npar= 60

---

The following ALERTS were generated. Each ALERT has the format

**test-name\_ALERT\_alert-type\_alert-level.**

Click on the hyperlinks for more details of the test.

---

### Alert level B

|                   |                                                  |      |        |
|-------------------|--------------------------------------------------|------|--------|
| PLAT043_ALERT_1_B | Calculated and Reported Mol. Weight Differ by .. | 8.98 | Check  |
| PLAT250_ALERT_2_B | Large U3/U1 Ratio for Average U(i,j) Tensor .... | 5.1  | Note   |
| PLAT601_ALERT_2_B | Unit Cell Contains Solvent Accessible VOIDS of . | 155  | Ang**3 |

---

### Alert level C

|                   |                                                  |        |        |
|-------------------|--------------------------------------------------|--------|--------|
| PLAT041_ALERT_1_C | Calc. and Reported SumFormula Strings Differ     | Please | Check  |
| PLAT051_ALERT_1_C | Mu(calc) and Mu(CIF) Ratio Differs from 1.0 by . | 1.62   | %      |
| PLAT052_ALERT_1_C | Info on Absorption Correction Method Not Given   | Please | Do !   |
| PLAT053_ALERT_1_C | Minimum Crystal Dimension Missing (or Error) ... | Please | Check  |
| PLAT054_ALERT_1_C | Medium Crystal Dimension Missing (or Error) ...  | Please | Check  |
| PLAT055_ALERT_1_C | Maximum Crystal Dimension Missing (or Error) ... | Please | Check  |
| PLAT068_ALERT_1_C | Reported F000 Differs from Calcd (or Missing)... | Please | Check  |
| PLAT085_ALERT_2_C | SHELXL Default Weighting Scheme is not Optimized | Please | Check  |
| PLAT215_ALERT_3_C | Disordered C2 has ADP max/min Ratio .....        | 3.6    | Note   |
| PLAT215_ALERT_3_C | Disordered C3 has ADP max/min Ratio .....        | 3.5    | Note   |
| PLAT242_ALERT_2_C | Low 'MainMol' Ueq as Compared to Neighbors of    | C1     | Check  |
| PLAT245_ALERT_2_C | U(iso) H2 Smaller than U(eq) C2 by               | 0.016  | Ang**2 |
| PLAT420_ALERT_2_C | D-H Bond Without Acceptor N3 --H3N .             | Please | Check  |
| PLAT420_ALERT_2_C | D-H Bond Without Acceptor N4 --H4N .             | Please | Check  |

---

### Alert level G

FORMU01\_ALERT\_2\_G There is a discrepancy between the atom counts in the  
\_chemical\_formula\_sum and the formula from the \_atom\_site\* data.

Atom count from \_chemical\_formula\_sum: C108 H72 Fe6 N36

Atom count from the \_atom\_site data: C72 H54 Fe6 N72

CELLZ01\_ALERT\_1\_G Difference between formula and atom\_site contents detected.

CELLZ01\_ALERT\_1\_G ALERT: Large difference may be due to a  
symmetry error - see SYMMG tests

From the CIF: \_cell\_formula\_units\_Z 1

From the CIF: \_chemical\_formula\_sum C108 H72 Fe6 N36

TEST: Compare cell contents of formula and atom\_site data

| atom | Z*formula | cif sites | diff   |
|------|-----------|-----------|--------|
| C    | 108.00    | 72.00     | 36.00  |
| H    | 72.00     | 54.00     | 18.00  |
| Fe   | 6.00      | 6.00      | 0.00   |
| N    | 36.00     | 72.00     | -36.00 |

|                   |                                                  |        |        |
|-------------------|--------------------------------------------------|--------|--------|
| PLAT004_ALERT_5_G | Polymeric Structure Found with Maximum Dimension | 1      | Info   |
| PLAT007_ALERT_5_G | Number of Unrefined Donor-H Atoms .....          | 2      | Report |
| PLAT045_ALERT_1_G | Calculated and Reported Z Differ by a Factor ... | 6.0000 | Check  |
| PLAT093_ALERT_1_G | No s.u.'s on H-positions, Refinement Reported as | mixed  | Check  |
| PLAT199_ALERT_1_G | Reported _cell_measurement_temperature .....     | 273    | Check  |
| PLAT200_ALERT_1_G | Reported _diffrn_ambient_temperature .....       | 273    | Check  |
| PLAT232_ALERT_2_G | Hirshfeld Test Diff (M-X) Fe1 --N1 .             | 6.3    | s.u.   |
| PLAT232_ALERT_2_G | Hirshfeld Test Diff (M-X) Fe2 --N2 .             | 5.9    | s.u.   |
| PLAT300_ALERT_4_G | Atom Site Occupancy of C2 Constrained at         | 0.5    | Check  |
| PLAT300_ALERT_4_G | Atom Site Occupancy of C3 Constrained at         | 0.5    | Check  |

|                   |                                                  |                           |        |              |
|-------------------|--------------------------------------------------|---------------------------|--------|--------------|
| PLAT300_ALERT_4_G | Atom Site Occupancy of H2                        | Constrained at            | 0.5    | Check        |
| PLAT300_ALERT_4_G | Atom Site Occupancy of H3                        | Constrained at            | 0.5    | Check        |
| PLAT300_ALERT_4_G | Atom Site Occupancy of H3N                       | Constrained at            | 0.5    | Check        |
| PLAT300_ALERT_4_G | Atom Site Occupancy of H4N                       | Constrained at            | 0.5    | Check        |
| PLAT301_ALERT_3_G | Main Residue Disorder .....                      | (Resd 1 )                 | 24%    | Note         |
| PLAT432_ALERT_2_G | Short Inter X...Y Contact C1                     | ..C2                      | 2.38   | Ang.         |
|                   |                                                  | $2/3-x, 1/3-x+y, 4/3-z =$ | 12_556 | Check        |
| PLAT432_ALERT_2_G | Short Inter X...Y Contact C1                     | ..C2                      | 2.38   | Ang.         |
|                   |                                                  | $2/3-x, 1/3-y, 4/3-z =$   | 25_556 | Check        |
| PLAT432_ALERT_2_G | Short Inter X...Y Contact C1                     | ..C3                      | 2.40   | Ang.         |
|                   |                                                  | $2/3-x, 1/3-y, 4/3-z =$   | 25_556 | Check        |
| PLAT432_ALERT_2_G | Short Inter X...Y Contact C1                     | ..C3                      | 2.40   | Ang.         |
|                   |                                                  | $2/3-x, 1/3-x+y, 4/3-z =$ | 12_556 | Check        |
| PLAT432_ALERT_2_G | Short Inter X...Y Contact C1                     | ..C1                      | 2.79   | Ang.         |
|                   |                                                  | $2/3-x, 1/3-x+y, 4/3-z =$ | 12_556 | Check        |
| PLAT432_ALERT_2_G | Short Inter X...Y Contact C2                     | ..C3                      | 1.38   | Ang.         |
|                   |                                                  | $2/3-x, 1/3-x+y, 4/3-z =$ | 12_556 | Check        |
| PLAT432_ALERT_2_G | Short Inter X...Y Contact C2                     | ..C3                      | 1.48   | Ang.         |
|                   |                                                  | $2/3-x, 1/3-y, 4/3-z =$   | 25_556 | Check        |
| PLAT432_ALERT_2_G | Short Inter X...Y Contact C2                     | ..C2                      | 2.63   | Ang.         |
|                   |                                                  | $2/3-x, 1/3-x+y, 4/3-z =$ | 12_556 | Check        |
| PLAT432_ALERT_2_G | Short Inter X...Y Contact C2                     | ..C2                      | 2.69   | Ang.         |
|                   |                                                  | $2/3-x, 1/3-y, 4/3-z =$   | 25_556 | Check        |
| PLAT432_ALERT_2_G | Short Inter X...Y Contact C3                     | ..C3                      | 2.70   | Ang.         |
|                   |                                                  | $2/3-x, 1/3-x+y, 4/3-z =$ | 12_556 | Check        |
| PLAT432_ALERT_2_G | Short Inter X...Y Contact C3                     | ..C3                      | 2.74   | Ang.         |
|                   |                                                  | $2/3-x, 1/3-y, 4/3-z =$   | 25_556 | Check        |
| PLAT779_ALERT_4_G | Suspect or Irrelevant (Bond) Angle(s) in CIF ... |                           | 24.20  | Deg.         |
|                   | C2 -C1 -C2                                       | 24_555 1_555 1_555 .....  | #      | 37 Check     |
| PLAT779_ALERT_4_G | Suspect or Irrelevant (Bond) Angle(s) in CIF ... |                           | 20.60  | Deg.         |
|                   | C3 -C1 -C3                                       | 24_555 1_555 1_555 .....  | #      | 42 Check     |
| PLAT883_ALERT_1_G | No Info/Value for _atom_sites_solution_primary . |                           |        | Please Do !  |
| PLAT965_ALERT_2_G | The SHELXL WEIGHT Optimisation has not Converged |                           |        | Please Check |
| PLAT978_ALERT_2_G | Number C-C Bonds with Positive Residual Density. |                           | 5      | Info         |

---

0 **ALERT level A** = Most likely a serious problem - resolve or explain  
 3 **ALERT level B** = A potentially serious problem, consider carefully  
 14 **ALERT level C** = Check. Ensure it is not caused by an omission or oversight  
 34 **ALERT level G** = General information/check it is not something unexpected

15 ALERT type 1 CIF construction/syntax error, inconsistent or missing data  
 23 ALERT type 2 Indicator that the structure model may be wrong or deficient  
 3 ALERT type 3 Indicator that the structure quality may be low  
 8 ALERT type 4 Improvement, methodology, query or suggestion  
 2 ALERT type 5 Informative message, check

---

It is advisable to attempt to resolve as many as possible of the alerts in all categories. Often the minor alerts point to easily fixed oversights, errors and omissions in your CIF or refinement strategy, so attention to these fine details can be worthwhile. In order to resolve some of the more serious problems it may be necessary to carry out additional measurements or structure refinements. However, the purpose of your study may justify the reported deviations and the more serious of these should normally be commented upon in the discussion or experimental section of a paper or in the "special\_details" fields of the CIF. checkCIF was carefully designed to identify outliers and unusual parameters, but every test has its limitations and alerts that are not important in a particular case may appear. Conversely, the absence of alerts does not guarantee there are no aspects of the results needing attention. It is up to the individual to critically assess their own results and, if necessary, seek expert advice.

### **Publication of your CIF in IUCr journals**

A basic structural check has been run on your CIF. These basic checks will be run on all CIFs submitted for publication in IUCr journals (*Acta Crystallographica*, *Journal of Applied Crystallography*, *Journal of Synchrotron Radiation*); however, if you intend to submit to *Acta Crystallographica Section C* or *E* or *IUCrData*, you should make sure that full publication checks are run on the final version of your CIF prior to submission.

### **Publication of your CIF in other journals**

Please refer to the *Notes for Authors* of the relevant journal for any special instructions relating to CIF submission.

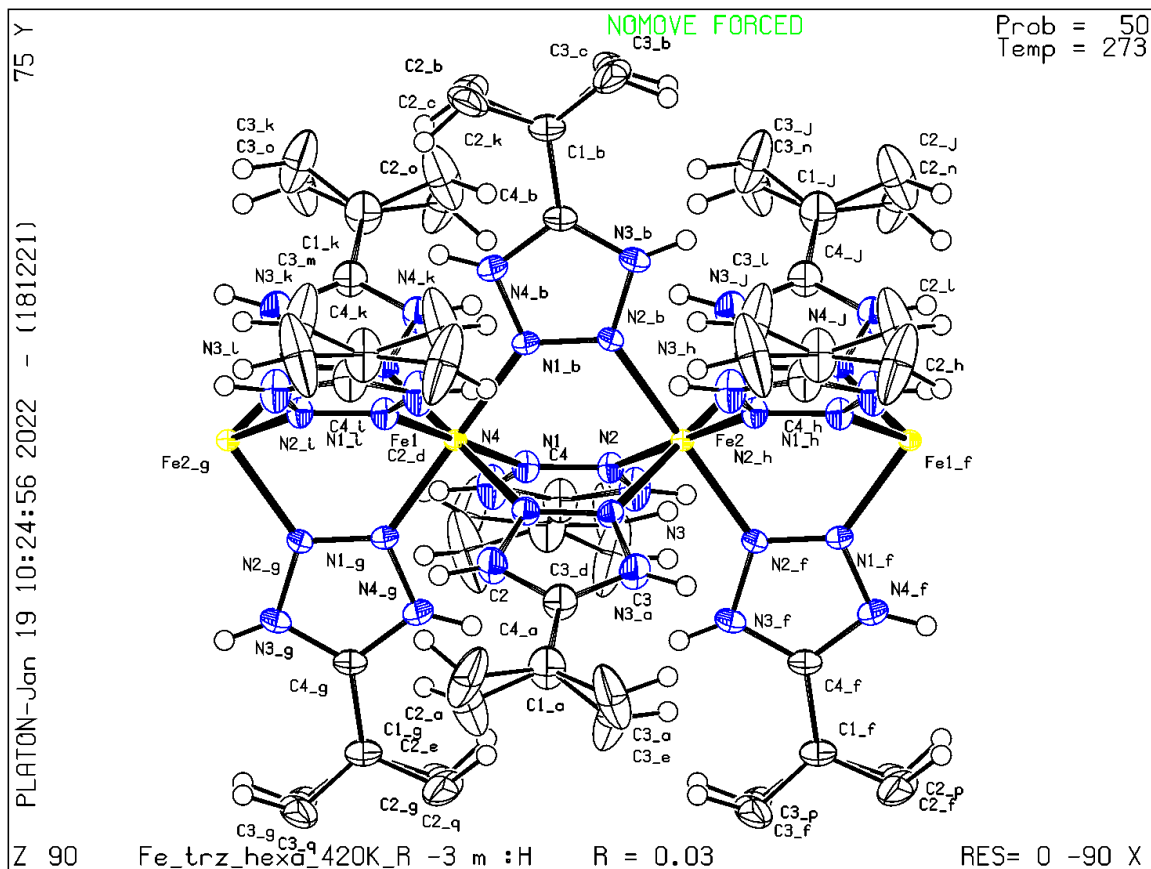

Supplement: Supplementary file 1 [file 2257495e5a43624497e33709.pdf]
