# Supplementary material for: Unravelling interplay between molecule-based spin-state switching and electron transport in a single-crystal 3D metal-organic framework
Source: Research Square preprint supplement (doi:10.21203/rs.3.rs-1689712/v1), 2022-06-01
Supplement: Supplementary file 2 [file 7b04dcd4ccbe7dcef8b5ccd9.pdf]

---

The following ALERTS were generated. Each ALERT has the format

**test-name\_ALERT\_alert-type\_alert-level.**

Click on the hyperlinks for more details of the test.

---

**Alert level B**

PLAT090\_ALERT\_3\_B Poor Data / Parameter Ratio (Zmax > 18) ..... 5.69 Note  
PLAT430\_ALERT\_2\_B Short Inter D...A Contact O1W ..O2W . 2.76 Ang.  
1-x+y,y,z = 5\_655 Check  
PLAT430\_ALERT\_2\_B Short Inter D...A Contact O1W ..N1 . 2.86 Ang.  
x,y,z = 1\_555 Check

---

**Alert level C**

ABSMU01\_ALERT\_1\_C The ratio of given/expected absorption coefficient lies  
outside the range 0.99 <> 1.01  
Calculated value of mu = 6.270  
Value of mu given = 6.150  
STRVA01\_ALERT\_4\_C Flack test results are ambiguous.  
From the CIF: \_refine\_ls\_abs\_structure\_Flack 0.500  
From the CIF: \_refine\_ls\_abs\_structure\_Flack\_su 0.030  
PLAT051\_ALERT\_1\_C Mu(calc) and Mu(CIF) Ratio Differs from 1.0 by . 1.94 %  
PLAT052\_ALERT\_1\_C Info on Absorption Correction Method Not Given Please Do !  
PLAT053\_ALERT\_1\_C Minimum Crystal Dimension Missing (or Error) ... Please Check  
PLAT054\_ALERT\_1\_C Medium Crystal Dimension Missing (or Error) ... Please Check  
PLAT055\_ALERT\_1\_C Maximum Crystal Dimension Missing (or Error) ... Please Check  
PLAT260\_ALERT\_2\_C Large Average Ueq of Residue Including O2W 0.142 Check  
PLAT911\_ALERT\_3\_C Missing FCF Refl Between Thmin & STh/L= 0.600 3 Report  
PLAT975\_ALERT\_2\_C Check Calcd Resid. Dens. 0.94Ang From O1W . 0.53 eA-3

---

**Alert level G**

PLAT003\_ALERT\_2\_G Number of Uiso or Uij Restrained non-H Atoms ... 16 Report  
PLAT004\_ALERT\_5\_G Polymeric Structure Found with Maximum Dimension 3 Info  
PLAT019\_ALERT\_1\_G \_diffrn\_measured\_fraction\_theta\_full/\*\_max < 1.0 0.950 Report  
PLAT083\_ALERT\_2\_G SHELXL Second Parameter in WGHT Unusually Large 24.74 Why ?  
PLAT111\_ALERT\_2\_G ADDSYM Detects New (Pseudo) Centre of Symmetry . 100 %Fit  
PLAT113\_ALERT\_2\_G ADDSYM Suggests Possible Pseudo/New Space Group R-3m Check  
PLAT186\_ALERT\_4\_G The CIF-Embedded .res File Contains ISOR Records 2 Report  
PLAT300\_ALERT\_4\_G Atom Site Occupancy of C2 Constrained at 0.5 Check  
PLAT300\_ALERT\_4\_G Atom Site Occupancy of C3 Constrained at 0.5 Check  
PLAT300\_ALERT\_4\_G Atom Site Occupancy of C4 Constrained at 0.5 Check  
PLAT300\_ALERT\_4\_G Atom Site Occupancy of C5 Constrained at 0.5 Check  
PLAT300\_ALERT\_4\_G Atom Site Occupancy of C6 Constrained at 0.5 Check  
PLAT300\_ALERT\_4\_G Atom Site Occupancy of C7 Constrained at 0.5 Check  
PLAT300\_ALERT\_4\_G Atom Site Occupancy of H2 Constrained at 0.5 Check  
PLAT300\_ALERT\_4\_G Atom Site Occupancy of H3 Constrained at 0.5 Check  
PLAT300\_ALERT\_4\_G Atom Site Occupancy of H5 Constrained at 0.5 Check  
PLAT300\_ALERT\_4\_G Atom Site Occupancy of H6 Constrained at 0.5 Check  
PLAT300\_ALERT\_4\_G Atom Site Occupancy of O1W Constrained at 0.5 Check  
PLAT300\_ALERT\_4\_G Atom Site Occupancy of O2W Constrained at 0.5 Check  
PLAT301\_ALERT\_3\_G Main Residue Disorder .....(Resd 1 ) 35% Note  
PLAT302\_ALERT\_4\_G Anion/Solvent/Minor-Residue Disorder (Resd 2 ) 100% Note  
PLAT302\_ALERT\_4\_G Anion/Solvent/Minor-Residue Disorder (Resd 3 ) 100% Note  
PLAT311\_ALERT\_2\_G Isolated Disordered Oxygen Atom (No H's ?) ..... O1W Check

|                   |                                                  |            |               |
|-------------------|--------------------------------------------------|------------|---------------|
| PLAT311_ALERT_2_G | Isolated Disordered Oxygen Atom (No H's ?) ..... | O2W        | Check         |
| PLAT432_ALERT_2_G | Short Inter X...Y Contact                        | O2W ..C6 . | 2.81 Ang.     |
|                   |                                                  | x,y,z =    | 1_555 Check   |
| PLAT789_ALERT_4_G | Atoms with Negative _atom_site_disorder_group #  |            | 11 Check      |
| PLAT794_ALERT_5_G | Tentative Bond Valency for Fe2 (III) .           |            | 3.71 Info     |
| PLAT860_ALERT_3_G | Number of Least-Squares Restraints .....         |            | 97 Note       |
| PLAT883_ALERT_1_G | No Info/Value for _atom_sites_solution_primary . |            | Please Do !   |
| PLAT910_ALERT_3_G | Missing # of FCF Reflection(s) Below Theta(Min). |            | 1 Note        |
| PLAT913_ALERT_3_G | Missing # of Very Strong Reflections in FCF .... |            | 2 Note        |
| PLAT982_ALERT_1_G | The C-f' = 0.0192 Deviates from IT-value =       |            | 0.0181 Check  |
| PLAT982_ALERT_1_G | The Fe-f' = -1.0935 Deviates from IT-value =     |            | -1.1336 Check |
| PLAT982_ALERT_1_G | The N-f' = 0.0330 Deviates from IT-value =       |            | 0.0311 Check  |
| PLAT982_ALERT_1_G | The O-f' = 0.0517 Deviates from IT-value =       |            | 0.0492 Check  |
| PLAT983_ALERT_1_G | The Fe-f" = 3.1934 Deviates from IT-Value =      |            | 3.1974 Check  |
| PLAT983_ALERT_1_G | The O-f" = 0.0336 Deviates from IT-Value =       |            | 0.0322 Check  |

---

0 **ALERT level A** = Most likely a serious problem - resolve or explain  
 3 **ALERT level B** = A potentially serious problem, consider carefully  
 10 **ALERT level C** = Check. Ensure it is not caused by an omission or oversight  
 37 **ALERT level G** = General information/check it is not something unexpected

14 ALERT type 1 CIF construction/syntax error, inconsistent or missing data  
 11 ALERT type 2 Indicator that the structure model may be wrong or deficient  
 6 ALERT type 3 Indicator that the structure quality may be low  
 17 ALERT type 4 Improvement, methodology, query or suggestion  
 2 ALERT type 5 Informative message, check

---

It is advisable to attempt to resolve as many as possible of the alerts in all categories. Often the minor alerts point to easily fixed oversights, errors and omissions in your CIF or refinement strategy, so attention to these fine details can be worthwhile. In order to resolve some of the more serious problems it may be necessary to carry out additional measurements or structure refinements. However, the purpose of your study may justify the reported deviations and the more serious of these should normally be commented upon in the discussion or experimental section of a paper or in the "special\_details" fields of the CIF. checkCIF was carefully designed to identify outliers and unusual parameters, but every test has its limitations and alerts that are not important in a particular case may appear. Conversely, the absence of alerts does not guarantee there are no aspects of the results needing attention. It is up to the individual to critically assess their own results and, if necessary, seek expert advice.

### **Publication of your CIF in IUCr journals**

A basic structural check has been run on your CIF. These basic checks will be run on all CIFs submitted for publication in IUCr journals (*Acta Crystallographica*, *Journal of Applied Crystallography*, *Journal of Synchrotron Radiation*); however, if you intend to submit to *Acta Crystallographica Section C* or *E* or *IUCrData*, you should make sure that full publication checks are run on the final version of your CIF prior to submission.

### **Publication of your CIF in other journals**

Please refer to the *Notes for Authors* of the relevant journal for any special instructions relating to CIF submission.

---

**PLATON version of 20/01/2022; check.def file version of 19/01/2022**
